# Supplementary material
Source: PubMed Central journal article supplement (PMC2981201)
Supplement: supp_192_23_6116__1.pdf [file supp_192_23_6116__1.pdf]

## Supplementary Data

**Table S1: Primers and templates used for PCR**

| Construct | PCR Template                  | Number | Primer Name   | Sequence                                 |
|-----------|-------------------------------|--------|---------------|------------------------------------------|
| pKDW38    | pKDW1                         | 753    | F-EcoRI-TMB   | CGAGAATTCAACAACAACATGAACCCG<br>GGTCAAGAC |
|           |                               | 769    | R-XbaI-TM2    | CGTCTAGATTGCAGGTACACAATGATC              |
| pKDW39    | pKDW1                         | 753    | F-EcoRI-TMB   | CGAGAATTCAACAACAACATGAACCCG<br>GGTCAAGAC |
|           |                               | 772    | R-XbaI-gamma2 | CGTCTAGAATTTTCATCTTCCTTTTTAG<br>CAGC     |
| pKDW40    | pKDW1                         | 753    | F-EcoRI-TMB   | CGAGAATTCAACAACAACATGAACCCG<br>GGTCAAGAC |
|           |                               | 770    | R-XbaI-alpha2 | CGTCTAGATTCTTCGATTGCAATGTTG              |
| pKDW42    | pKDW6                         | 753    | F-EcoRI-TMB   | CGAGAATTCAACAACAACATGAACCCG<br>GGTCAAGAC |
|           |                               | 772    | R-XbaI-gamma2 | CGTCTAGAATTTTCATCTTCCTTTTTAG<br>CAGC     |
| pKDW44    | <i>E. coli</i> genomic<br>DNA | 759    | F-ApaI-FtsQ   | ATAGGGCCCATGTTCGAGGCTGC                  |
|           |                               | 180    | R-Col-FtsQ    | GGAATTCTCATTGTTGTTCTGCCTGTGC             |
| pKDW48    | pKDW1                         | 753    | F-EcoRI-TMB   | CGAGAATTCAACAACAACATGAACCCG<br>GGTCAAGAC |
|           |                               | 771    | R-XbaI-beta2  | CGTCTAGGATGATAGAAGGATACG                 |
| pKDW49    | pKDW9                         | 754    | F-EcoRI-TMR   | CGAGAATTCAACAACAACATGGCTCGT<br>GCACGC    |
|           |                               | 772    | R-XbaI-gamma2 | CGTCTAGAATTTTCATCTTCCTTTTTAG<br>CAGC     |
| pSLR117   | pLH11                         | 753    | F-EcoRI-TMB   | CGAGAATTCAACAACAACATGAACCCG<br>GGTCAAGAC |
| pSLR118   | pLH11                         | 802    | R-XbaI-LEVA   | CGTCTAGAAGCTTTATCGTTTTTCCAA<br>ACTC      |
|           |                               | 753    | F-EcoRI-TMB   | CGAGAATTCAACAACAACATGAACCCG<br>GGTCAAGAC |
| pSLR119   | pLH11                         | 803    | R-XbaI-EEFG   | CGTCTAGACCCAAACTCTTCAAATAG<br>GTG        |
|           |                               | 753    | F-EcoRI-TMB   | CGAGAATTCAACAACAACATGAACCCG<br>GGTCAAGAC |
|           |                               | 801    | R-XbaI-DKAA   | CGTCTAGAAGCAGCTTTATCGTTTTTCC<br>CAAACCTC |
